# Supplementary material for: Development of Quantitative Real-Time PCR Assays for Rapid and Sensitive Detection of Two Badnavirus Species in Sugarcane
Source: Hindawi journal article supplement (doi:10.1155/2018/8678242), 2018-08-06
Supplement: f1 [file 8678242.f1.pdf]

**TABLE S1** List of sugarcane leaf samples collected from Fujian and Yunnan provinces, China

| No. | Clone <sup>a</sup> | Sampling date | Sampling location | Geographic origin    |
|-----|--------------------|---------------|-------------------|----------------------|
| 1   | FN07-2020(1)       | 2015/06       | Fuzhou, Fujian    | Fuzhou, Fujian       |
| 2   | FN07-2020(2)       | 2015/06       | Fuzhou, Fujian    | Fuzhou, Fujian       |
| 3   | FN07-2020(3)       | 2015/06       | Fuzhou, Fujian    | Fuzhou, Fujian       |
| 4   | FN40(1)            | 2015/06       | Fuzhou, Fujian    | Fuzhou, Fujian       |
| 5   | FN40(2)            | 2015/06       | Fuzhou, Fujian    | Fuzhou, Fujian       |
| 6   | FN40(3)            | 2015/06       | Fuzhou, Fujian    | Fuzhou, Fujian       |
| 7   | GZ07-538(1)        | 2015/06       | Fuzhou, Fujian    | Ganzhou, Jiangxi     |
| 8   | GZ07-538(2)        | 2015/06       | Fuzhou, Fujian    | Ganzhou, Jiangxi     |
| 9   | GZ07-538(3)        | 2015/06       | Fuzhou, Fujian    | Ganzhou, Jiangxi     |
| 10  | LC07-500(1)        | 2015/06       | Fuzhou, Fujian    | Liuzhou, Guangxi     |
| 11  | LC07-500(2)        | 2015/06       | Fuzhou, Fujian    | Liuzhou, Guangxi     |
| 12  | LC07-50(3)         | 2015/06       | Fuzhou, Fujian    | Liuzhou, Guangxi     |
| 13  | MT02-205(1)        | 2015/06       | Fuzhou, Fujian    | Zhangzhou, Fujian    |
| 14  | MT02-205(2)        | 2015/06       | Fuzhou, Fujian    | Zhangzhou, Fujian    |
| 15  | MT02-205(3)        | 2015/06       | Fuzhou, Fujian    | Zhangzhou, Fujian    |
| 16  | ROC16(1)           | 2015/06       | Fuzhou, Fujian    | Fuzhou, Fujian       |
| 17  | ROC16(2)           | 2015/06       | Fuzhou, Fujian    | Fuzhou, Fujian       |
| 18  | ROC16(3)           | 2015/06       | Fuzhou, Fujian    | Fuzhou, Fujian       |
| 19  | YG43(1)            | 2015/06       | Fuzhou, Fujian    | Guangzhou, Guangdong |
| 20  | YG43(2)            | 2015/06       | Fuzhou, Fujian    | Guangzhou, Guangdong |
| 21  | YG43(3)            | 2015/06       | Fuzhou, Fujian    | Guangzhou, Guangdong |
| 22  | YG46(1)            | 2015/06       | Fuzhou, Fujian    | Guangzhou, Guangdong |
| 23  | YG46(2)            | 2015/06       | Fuzhou, Fujian    | Guangzhou, Guangdong |
| 24  | YG46(3)            | 2015/06       | Fuzhou, Fujian    | Guangzhou, Guangdong |
| 25  | YR07-1433(1)       | 2015/06       | Fuzhou, Fujian    | Ruili, Yunnan        |
| 26  | YR07-1433(2)       | 2015/06       | Fuzhou, Fujian    | Ruili, Yunnan        |
| 27  | YR07-1433(3)       | 2015/06       | Fuzhou, Fujian    | Ruili, Yunnan        |
| 28  | YZ07-2384(1)       | 2015/06       | Fuzhou, Fujian    | Kaiyuan, Yunnan      |
| 29  | YZ07-2384(2)       | 2015/06       | Fuzhou, Fujian    | Kaiyuan, Yunnan      |
| 30  | YZ07-2384(3)       | 2015/06       | Fuzhou, Fujian    | Kaiyuan, Yunnan      |
| 31  | DZ07-36(1)         | 2015/06       | Fuzhou, Fujian    | Dehong, Yunnan       |
| 32  | DZ07-36(2)         | 2015/06       | Fuzhou, Fujian    | Dehong, Yunnan       |
| 33  | DZ07-36(3)         | 2015/06       | Fuzhou, Fujian    | Dehong, Yunnan       |
| 34  | FN09-2201(1)       | 2015/06       | Fuzhou, Fujian    | Fuzhou, Fujian       |
| 35  | FN09-2201(2)       | 2015/06       | Fuzhou, Fujian    | Fuzhou, Fujian       |
| 36  | FN09-2201(3)       | 2015/06       | Fuzhou, Fujian    | Fuzhou, Fujian       |
| 37  | FN09-7111(1)       | 2015/06       | Fuzhou, Fujian    | Fuzhou, Fujian       |
| 38  | FN09-7111(2)       | 2015/06       | Fuzhou, Fujian    | Fuzhou, Fujian       |
| 39  | FN09-7111(3)       | 2015/06       | Fuzhou, Fujian    | Fuzhou, Fujian       |
| 40  | GT06-2081(1)       | 2015/06       | Fuzhou, Fujian    | Nanning, Guangxi     |
| 41  | GT06-2081(2)       | 2015/06       | Fuzhou, Fujian    | Nanning, Guangxi     |
| 42  | GT06-2081(3)       | 2015/06       | Fuzhou, Fujian    | Nanning, Guangxi     |
| 43  | GT07-25(1)         | 2015/06       | Fuzhou, Fujian    | Nanning, Guangxi     |
| 44  | GT07-25(2)         | 2015/06       | Fuzhou, Fujian    | Nanning, Guangxi     |
| 45  | GT07-25(3)         | 2015/06       | Fuzhou, Fujian    | Nanning, Guangxi     |
| 46  | GT08-1180(1)       | 2015/06       | Fuzhou, Fujian    | Nanning, Guangxi     |
| 47  | GT08-1180(2)       | 2015/06       | Fuzhou, Fujian    | Nanning, Guangxi     |

|    |               |         |                |                      |
|----|---------------|---------|----------------|----------------------|
| 48 | GT08-1180(3)  | 2015/06 | Fuzhou, Fujian | Nanning, Guangxi     |
| 49 | Haizhe22(1)   | 2015/06 | Fuzhou, Fujian | Yacheng, Hainan      |
| 50 | Haizhe22(2)   | 2015/06 | Fuzhou, Fujian | Yacheng, Hainan      |
| 51 | Haizhe22(3)   | 2015/06 | Fuzhou, Fujian | Yacheng, Hainan      |
| 52 | LC07-150(1)   | 2015/06 | Fuzhou, Fujian | Liuzhou, Guangxi     |
| 53 | LC07-150(2)   | 2015/06 | Fuzhou, Fujian | Liuzhou, Guangxi     |
| 54 | LC07-150(3)   | 2015/06 | Fuzhou, Fujian | Liuzhou, Guangxi     |
| 55 | ROC22(1)      | 2015/06 | Fuzhou, Fujian | Taiwan Island        |
| 56 | ROC22(2)      | 2015/06 | Fuzhou, Fujian | Taiwan Island        |
| 57 | ROC22(3)      | 2015/06 | Fuzhou, Fujian | Taiwan Island        |
| 58 | YG47(1)       | 2015/06 | Fuzhou, Fujian | Guangzhou, Guangdong |
| 59 | YG47(2)       | 2015/06 | Fuzhou, Fujian | Guangzhou, Guangdong |
| 60 | YG47(3)       | 2015/06 | Fuzhou, Fujian | Guangzhou, Guangdong |
| 61 | YZ08-1145(1)  | 2015/06 | Fuzhou, Fujian | Kaiyuan, Yunnan      |
| 62 | YZ08-1145(2)  | 2015/06 | Fuzhou, Fujian | Kaiyuan, Yunnan      |
| 63 | YZ08-1145(3)  | 2015/06 | Fuzhou, Fujian | Kaiyuan, Yunnan      |
| 64 | FN10-6716(1)  | 2015/06 | Fuzhou, Fujian | Fuzhou, Fujian       |
| 65 | FN10-6716(2)  | 2015/06 | Fuzhou, Fujian | Fuzhou, Fujian       |
| 66 | FN10-6716(3)  | 2015/06 | Fuzhou, Fujian | Fuzhou, Fujian       |
| 67 | DZ09-78(1)    | 2015/06 | Fuzhou, Fujian | Dehong, Yunnan       |
| 68 | DZ09-78(2)    | 2015/06 | Fuzhou, Fujian | Dehong, Yunnan       |
| 69 | DZ09-78(3)    | 2015/06 | Fuzhou, Fujian | Dehong, Yunnan       |
| 70 | FN09-12206(1) | 2015/06 | Fuzhou, Fujian | Fuzhou, Fujian       |
| 71 | FN09-12206(2) | 2015/06 | Fuzhou, Fujian | Fuzhou, Fujian       |
| 72 | FN09-12206(3) | 2015/06 | Fuzhou, Fujian | Fuzhou, Fujian       |
| 73 | FN09-4095(1)  | 2015/06 | Fuzhou, Fujian | Fuzhou, Fujian       |
| 74 | FN09-4095(2)  | 2015/06 | Fuzhou, Fujian | Fuzhou, Fujian       |
| 75 | FN09-4095(3)  | 2015/06 | Fuzhou, Fujian | Fuzhou, Fujian       |
| 76 | FN10-2105(1)  | 2015/06 | Fuzhou, Fujian | Fuzhou, Fujian       |
| 77 | FN10-2105(2)  | 2015/06 | Fuzhou, Fujian | Fuzhou, Fujian       |
| 78 | FN10-2105(3)  | 2015/06 | Fuzhou, Fujian | Fuzhou, Fujian       |
| 79 | GT06-1492(1)  | 2015/06 | Fuzhou, Fujian | Nanning, Guangxi     |
| 80 | GT06-1492(2)  | 2015/06 | Fuzhou, Fujian | Nanning, Guangxi     |
| 81 | GT06-1492(3)  | 2015/06 | Fuzhou, Fujian | Nanning, Guangxi     |
| 82 | GT08-1533(1)  | 2015/06 | Fuzhou, Fujian | Nanning, Guangxi     |
| 83 | GT08-1533(2)  | 2015/06 | Fuzhou, Fujian | Nanning, Guangxi     |
| 84 | GT08-1533(3)  | 2015/06 | Fuzhou, Fujian | Nanning, Guangxi     |
| 85 | LC07-506(1)   | 2015/06 | Fuzhou, Fujian | Liuzhou, Guangxi     |
| 86 | LC07-506(2)   | 2015/06 | Fuzhou, Fujian | Liuzhou, Guangxi     |
| 87 | LC07-506(3)   | 2015/06 | Fuzhou, Fujian | Liuzhou, Guangxi     |
| 88 | MT07-2005(1)  | 2015/06 | Fuzhou, Fujian | Zhangzhou, Fujian    |
| 89 | MT07-2005(2)  | 2015/06 | Fuzhou, Fujian | Zhangzhou, Fujian    |
| 90 | MT07-2005(3)  | 2015/06 | Fuzhou, Fujian | Zhangzhou, Fujian    |
| 91 | MT09-104(1)   | 2015/06 | Fuzhou, Fujian | Zhangzhou, Fujian    |
| 92 | MT09-104(2)   | 2015/06 | Fuzhou, Fujian | Zhangzhou, Fujian    |
| 93 | MT09-104(3)   | 2015/06 | Fuzhou, Fujian | Zhangzhou, Fujian    |
| 94 | YG48(1)       | 2015/06 | Fuzhou, Fujian | Guangzhou, Guangdong |
| 95 | YG48(2)       | 2015/06 | Fuzhou, Fujian | Guangzhou, Guangdong |
| 96 | YG48(3)       | 2015/06 | Fuzhou, Fujian | Guangzhou, Guangdong |
| 97 | YG50(1)       | 2015/06 | Fuzhou, Fujian | Guangzhou, Guangdong |

|     |               |         |                 |                      |
|-----|---------------|---------|-----------------|----------------------|
| 98  | YG50(2)       | 2015/06 | Fuzhou, Fujian  | Guangzhou, Guangdong |
| 99  | YG50(3)       | 2015/06 | Fuzhou, Fujian  | Guangzhou, Guangdong |
| 100 | YR09-315(1)   | 2015/06 | Fuzhou, Fujian  | Ruili, Yunnan        |
| 101 | YR09-315(2)   | 2015/06 | Fuzhou, Fujian  | Ruili, Yunnan        |
| 102 | YR09-315(3)   | 2015/06 | Fuzhou, Fujian  | Ruili, Yunnan        |
| 103 | YR10-187(1)   | 2015/06 | Fuzhou, Fujian  | Ruili, Yunnan        |
| 104 | YR10-187(2)   | 2015/06 | Fuzhou, Fujian  | Ruili, Yunnan        |
| 105 | YR10-187(3)   | 2015/06 | Fuzhou, Fujian  | Ruili, Yunnan        |
| 106 | YR10-701(1)   | 2015/06 | Fuzhou, Fujian  | Ruili, Yunnan        |
| 107 | YR10-701(2)   | 2015/06 | Fuzhou, Fujian  | Ruili, Yunnan        |
| 108 | YR10-701(3)   | 2015/06 | Fuzhou, Fujian  | Ruili, Yunnan        |
| 109 | YZ09-1208(1)  | 2015/06 | Fuzhou, Fujian  | Kaiyuan, Yunnan      |
| 110 | YZ09-1208(2)  | 2015/06 | Fuzhou, Fujian  | Kaiyuan, Yunnan      |
| 111 | YZ09-1208(3)  | 2015/06 | Fuzhou, Fujian  | Kaiyuan, Yunnan      |
| 112 | YZ09-1601(1)  | 2015/06 | Fuzhou, Fujian  | Kaiyuan, Yunnan      |
| 113 | YZ09-1601(2)  | 2015/06 | Fuzhou, Fujian  | Kaiyuan, Yunnan      |
| 114 | YZ09-1601(3)  | 2015/06 | Fuzhou, Fujian  | Kaiyuan, Yunnan      |
| 115 | FN09-12206    | 2017/07 | Baoshan, Yunnan | Fuzhou, Fujian       |
| 116 | FN11-2097     | 2017/07 | Baoshan, Yunnan | Fuzhou, Fujian       |
| 117 | YZ10-1666     | 2017/07 | Baoshan, Yunnan | Kaiyuan, Yunnan      |
| 118 | YR11-450      | 2017/07 | Baoshan, Yunnan | Ruili, Yunnan        |
| 119 | YZ11-3898     | 2017/07 | Baoshan, Yunnan | Kaiyuan, Yunnan      |
| 120 | ROC22         | 2017/07 | Baoshan, Yunnan | Taiwan Island        |
| 121 | ROC22         | 2017/07 | Baoshan, Yunnan | Taiwan Island        |
| 122 | YT86-368      | 2017/07 | Baoshan, Yunnan | Guangzhou, Guangdong |
| 123 | FN09-12206    | 2017/07 | Dehong, Yunnan  | Fuzhou, Fujian       |
| 124 | FN09-6201     | 2017/07 | Dehong, Yunnan  | Fuzhou, Fujian       |
| 125 | FN09-2201     | 2017/07 | Dehong, Yunnan  | Fuzhou, Fujian       |
| 126 | GT06-1492     | 2017/07 | Dehong, Yunnan  | Nanning, Guangxi     |
| 127 | GT08-120      | 2017/07 | Dehong, Yunnan  | Nanning, Guangxi     |
| 128 | YZ08-1095     | 2017/07 | Dehong, Yunnan  | Kaiyuan, Yunnan      |
| 129 | YZ11-120      | 2017/07 | Dehong, Yunnan  | Kaiyuan, Yunnan      |
| 130 | MT11-610      | 2017/07 | Dehong, Yunnan  | Zhangzhou, Fujian    |
| 131 | Zhongtang1201 | 2017/07 | Dehong, Yunnan  | Danzhou, Hainan      |
| 132 | Zhongzhe10    | 2017/07 | Dehong, Yunnan  | Nanning, Guangxi     |
| 133 | GT08-8        | 2017/07 | Dehong, Yunnan  | Nanning, Guangxi     |
| 134 | YZ10-1666     | 2017/07 | Dehong, Yunnan  | Kaiyuan, Yunnan      |
| 135 | YT93-159      | 2017/07 | Dehong, Yunnan  | Guangzhou, Guangdong |
| 136 | YG47          | 2017/07 | Lincang, Yunnan | Guangzhou, Guangdong |
| 137 | GT06-2081     | 2017/07 | Lincang, Yunnan | Nanning, Guangxi     |
| 138 | GT08-1180     | 2017/07 | Lincang, Yunnan | Nanning, Guangxi     |
| 139 | YZ08-1095     | 2017/07 | Lincang, Yunnan | Kaiyuan, Yunnan      |
| 140 | ROC22         | 2017/07 | Lincang, Yunnan | Taiwan Island        |
| 141 | FN09-2201     | 2017/07 | Lincang, Yunnan | Fuzhou, Fujian       |
| 142 | LC07-150      | 2017/07 | Lincang, Yunnan | Liuzhou, Guangxi     |
| 143 | DZ07-36       | 2017/07 | Lincang, Yunnan | Dehong, Yunnan       |
| 144 | MT06-1405     | 2017/07 | Lincang, Yunnan | Zhangzhou, Fujian    |
| 145 | GT06-1492     | 2017/07 | Lincang, Yunnan | Nanning, Guangxi     |
| 146 | MT07-2005     | 2017/07 | Lincang, Yunnan | Zhangzhou, Fujian    |
| 147 | Zhongtang1201 | 2017/07 | Lincang, Yunnan | Danzhou, Hainan      |

|     |               |         |                 |                      |
|-----|---------------|---------|-----------------|----------------------|
| 148 | Zhongzhe1     | 2017/07 | Lincang, Yunnan | Nanning, Guangxi     |
| 149 | YZ10-1666     | 2017/07 | Lincang, Yunnan | Kaiyuan, Yunnan      |
| 150 | GT08-8        | 2017/07 | Lincang, Yunnan | Nanning, Guangxi     |
| 151 | GT10-701      | 2017/07 | Lincang, Yunnan | Nanning, Guangxi     |
| 152 | YZ11-3898     | 2017/07 | Lincang, Yunnan | Kaiyuan, Yunnan      |
| 153 | GT08-120      | 2017/07 | Lincang, Yunnan | Nanning, Guangxi     |
| 154 | FN09-7111     | 2017/07 | Lincang, Yunnan | Fuzhou, Fujian       |
| 155 | GT40          | 2017/07 | Lincang, Yunnan | Nanning, Guangxi     |
| 156 | GT44          | 2017/07 | Lincang, Yunnan | Nanning, Guangxi     |
| 157 | GT08-1589     | 2017/07 | Lincang, Yunnan | Nanning, Guangxi     |
| 158 | YT60          | 2017/07 | Lincang, Yunnan | Guangzhou, Guangdong |
| 159 | GT02-901      | 2017/07 | Lincang, Yunnan | Nanning, Guangxi     |
| 160 | LC05-136      | 2017/07 | Lincang, Yunnan | Liuzhou, Guangxi     |
| 161 | ROC22         | 2017/07 | Lincang, Yunnan | Taiwan Island        |
| 162 | FN40          | 2017/07 | Lincang, Yunnan | Fuzhou, Fujian       |
| 163 | YZ05-51       | 2017/07 | Lincang, Yunnan | Kaiyuan, Yunnan      |
| 164 | GT31          | 2017/07 | Lincang, Yunnan | Nanning, Guangxi     |
| 165 | YT86-368      | 2017/07 | Lincang, Yunnan | Guangzhou, Guangdong |
| 166 | YZ05-49       | 2017/07 | Lincang, Yunnan | Kaiyuan, Yunnan      |
| 167 | YT93-160      | 2017/07 | Lincang, Yunnan | Guangzhou, Guangdong |
| 168 | YT93-160      | 2017/07 | Lincang, Yunnan | Guangzhou, Guangdong |
| 169 | YT93-160      | 2017/07 | Lincang, Yunnan | Guangzhou, Guangdong |
| 170 | DZ07-78       | 2017/07 | Lincang, Yunnan | Dehong, Yunnan       |
| 171 | YT60          | 2017/07 | Lincang, Yunnan | Guangzhou, Guangdong |
| 172 | YR09-826      | 2017/07 | Lincang, Yunnan | Ruili, Yunnan        |
| 173 | DZ09-78       | 2017/07 | Lincang, Yunnan | Dehong, Yunnan       |
| 174 | Dianzhe02-277 | 2017/07 | Lincang, Yunnan | Kaiyuan, Yunnan      |
| 175 | ROC22         | 2017/07 | Lincang, Yunnan | Taiwan Island        |
| 176 | YT86-368      | 2017/07 | Lincang, Yunnan | Guangzhou, Guangdong |

<sup>a</sup> The number in the bracket presents the order of leaf samples in different plants.
